# Supplementary material for: Total synthesis and evaluation of Wnt signal inhibition of melleumin A and B, and their derivatives
Source: Royal Society of Chemistry journal article supplement (doi:10.1039/c0ob00352b), 2010-09-23
Supplement: c0ob00352b.pdf [file c0ob00352b.pdf]

## Supporting Information

### **Total synthesis and evaluation of melleumin A, a cyclic depsipeptide from the myxomycete *Physarum melleum***

Midori A. Arai,\* Shuwa Hanazawa, Yujiro Uchino, Xiaofan Li, and Masami Ishibashi \*

*Graduate School of Pharmaceutical Sciences, Chiba University, Chiba 263-8522,  
Japan*

#### Contents

S2~17  $^1\text{H}$  and  $^{13}\text{C}$  NMR spectra.

S15 COSY and HMBC of compound **26**.

S18~ X-ray Structure Report.

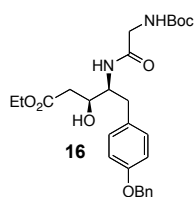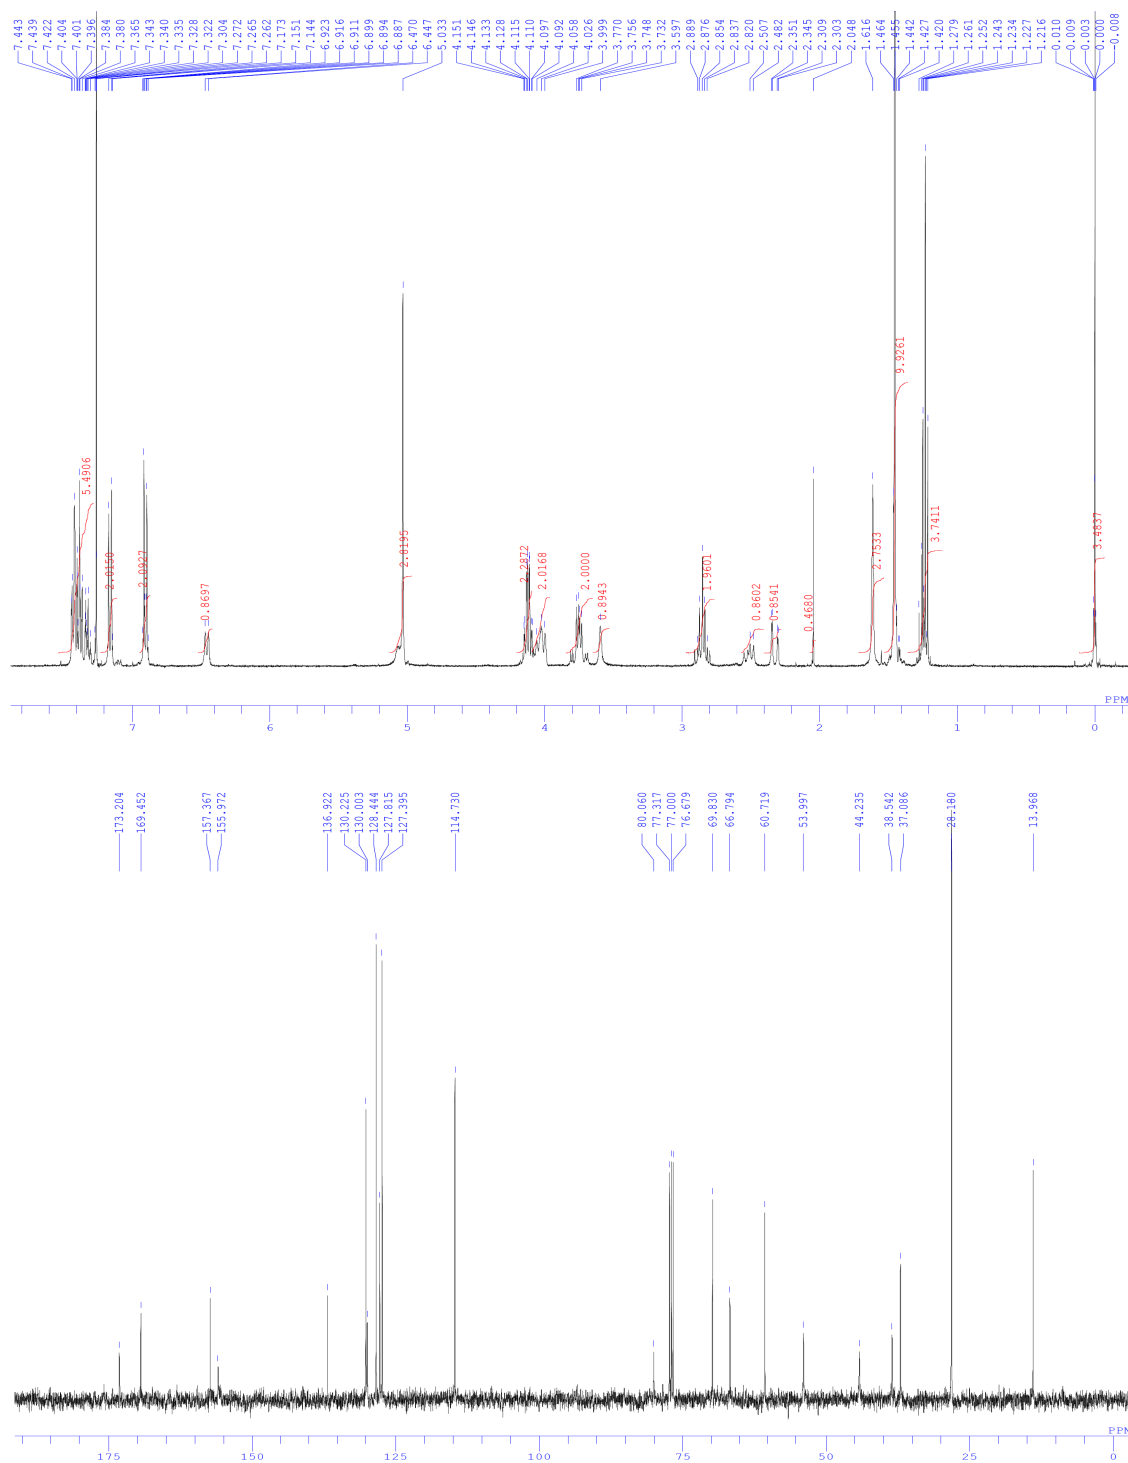

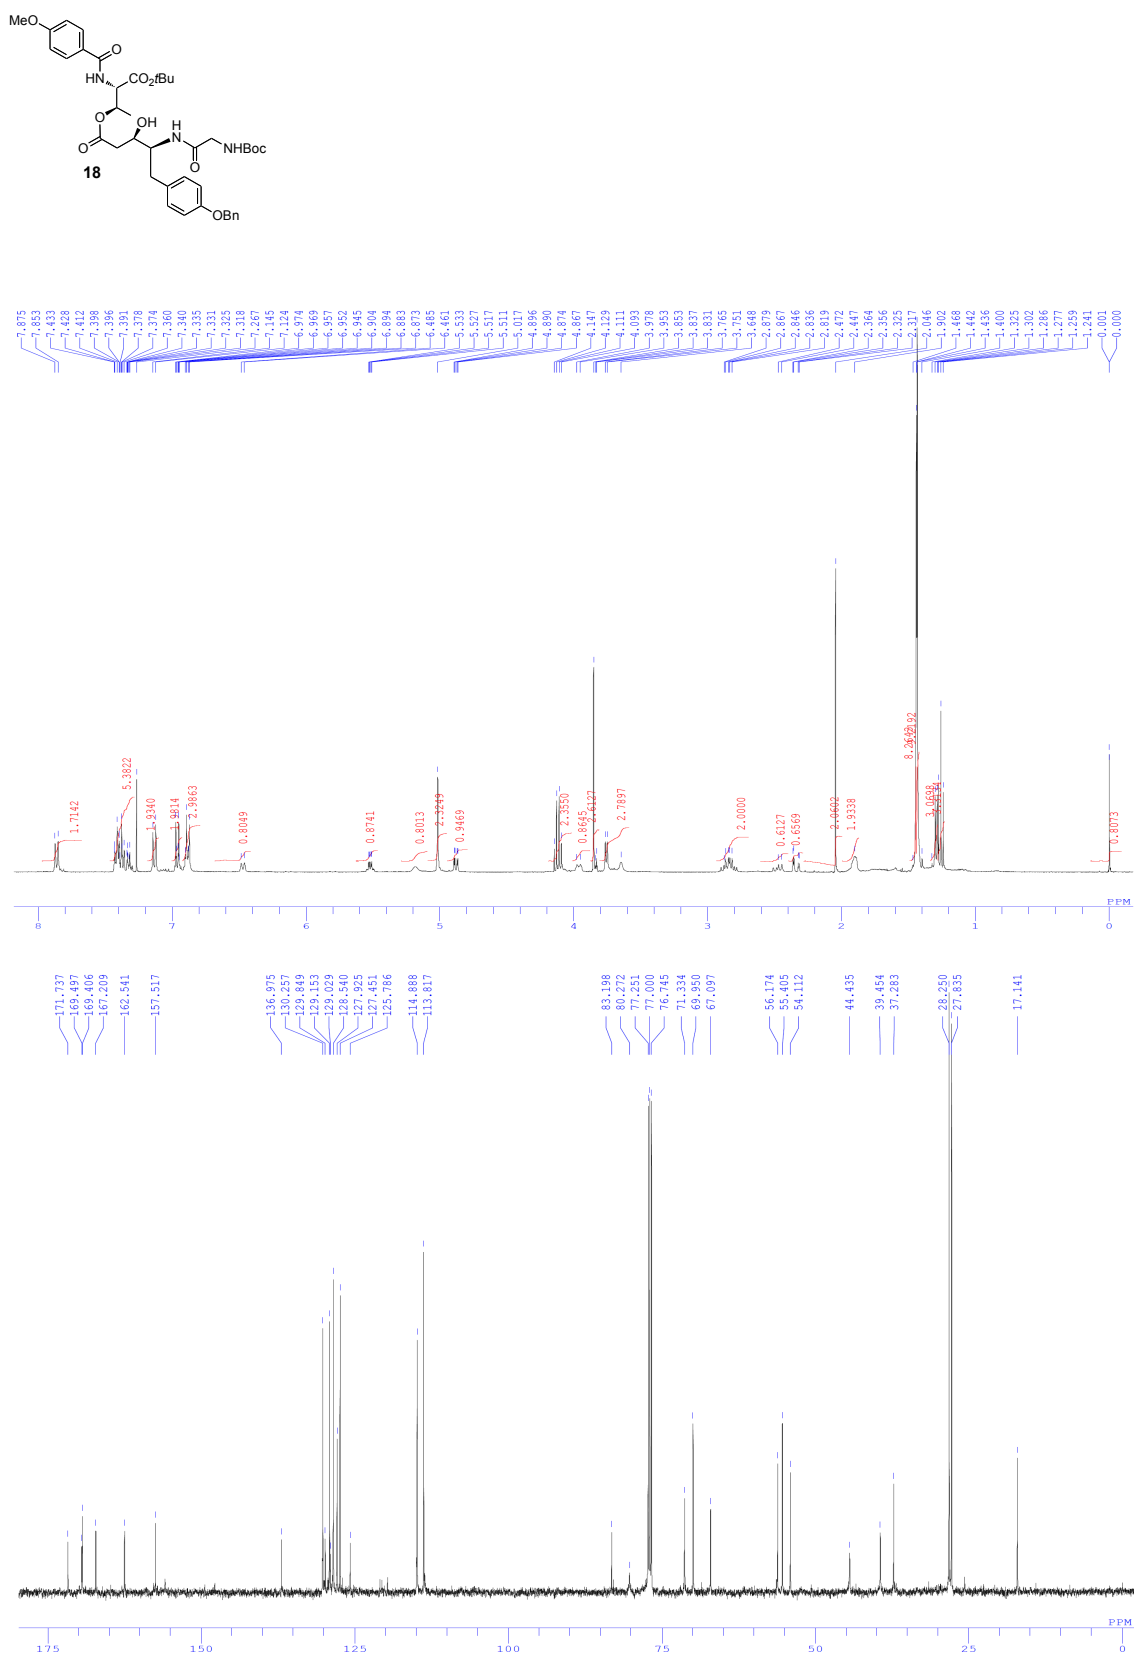

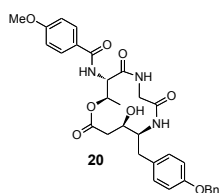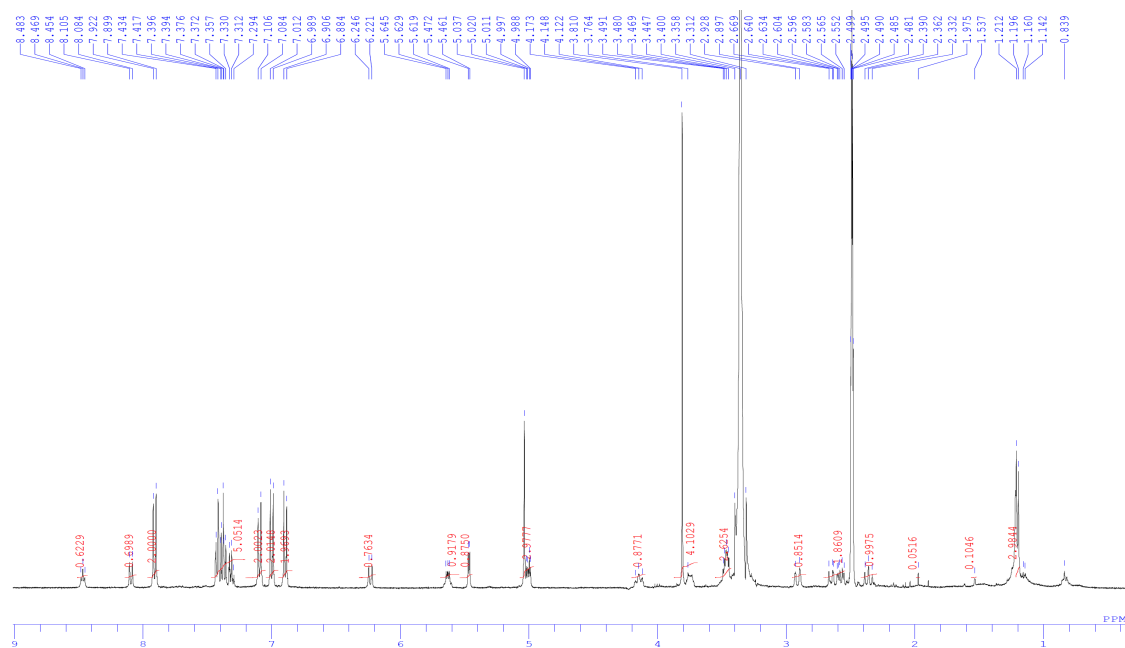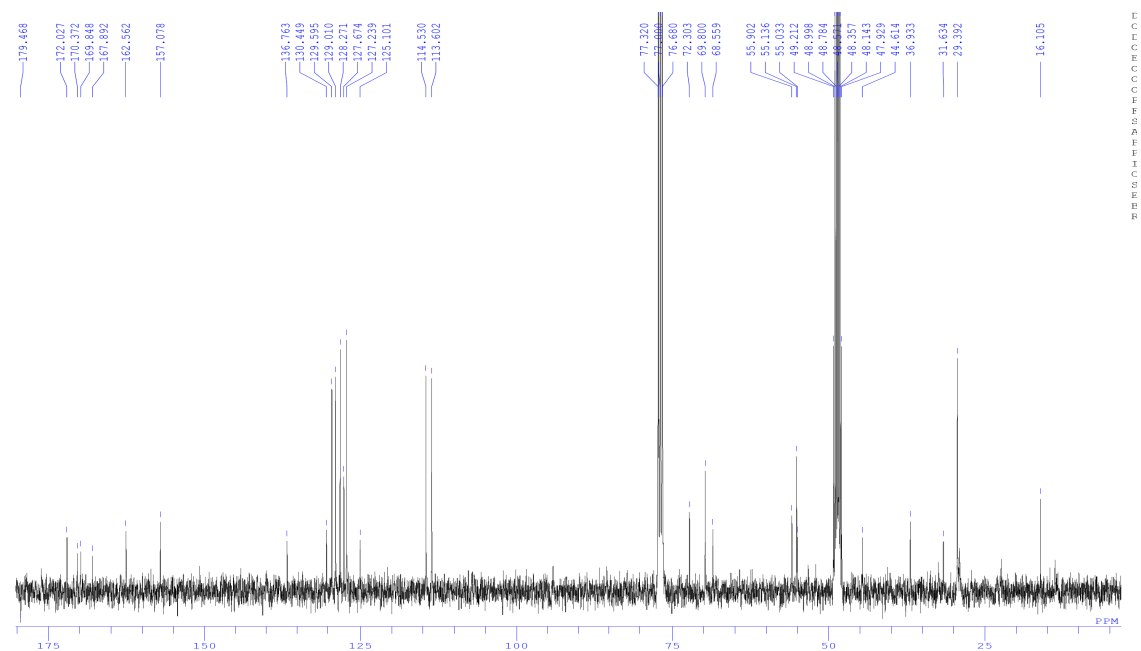



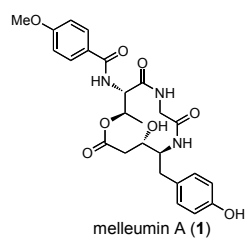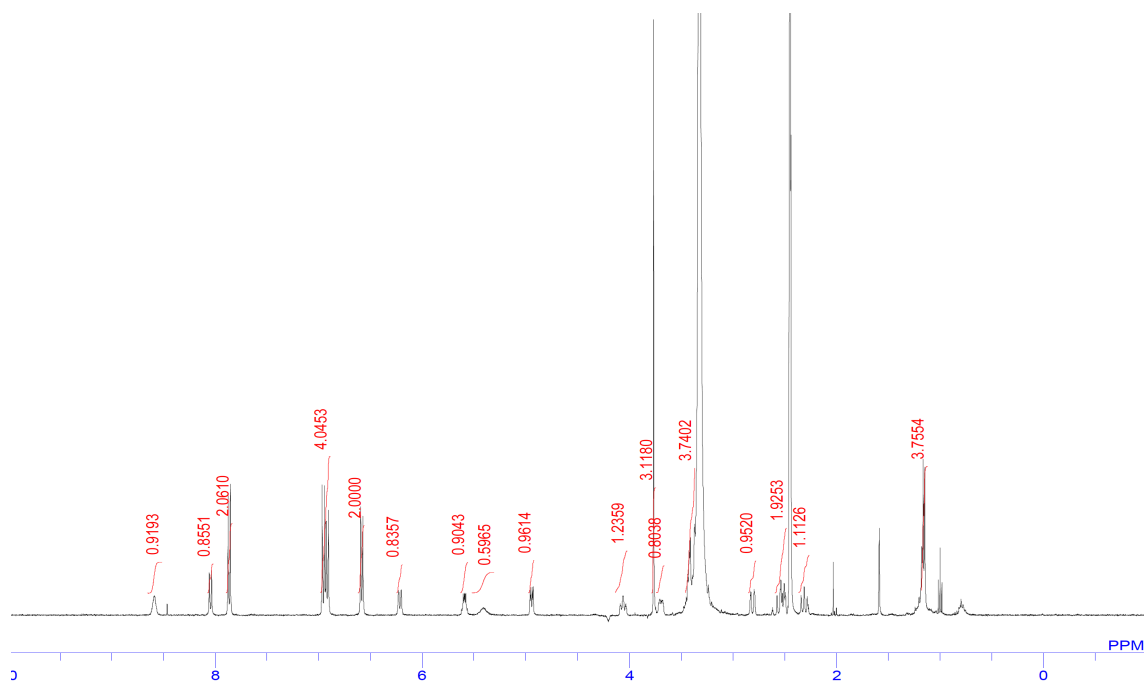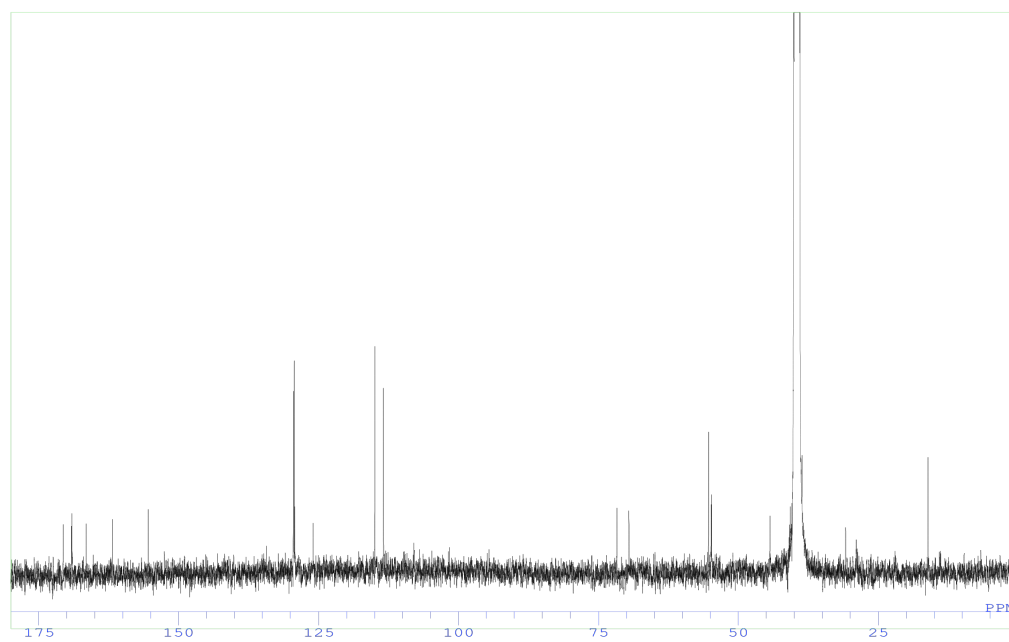

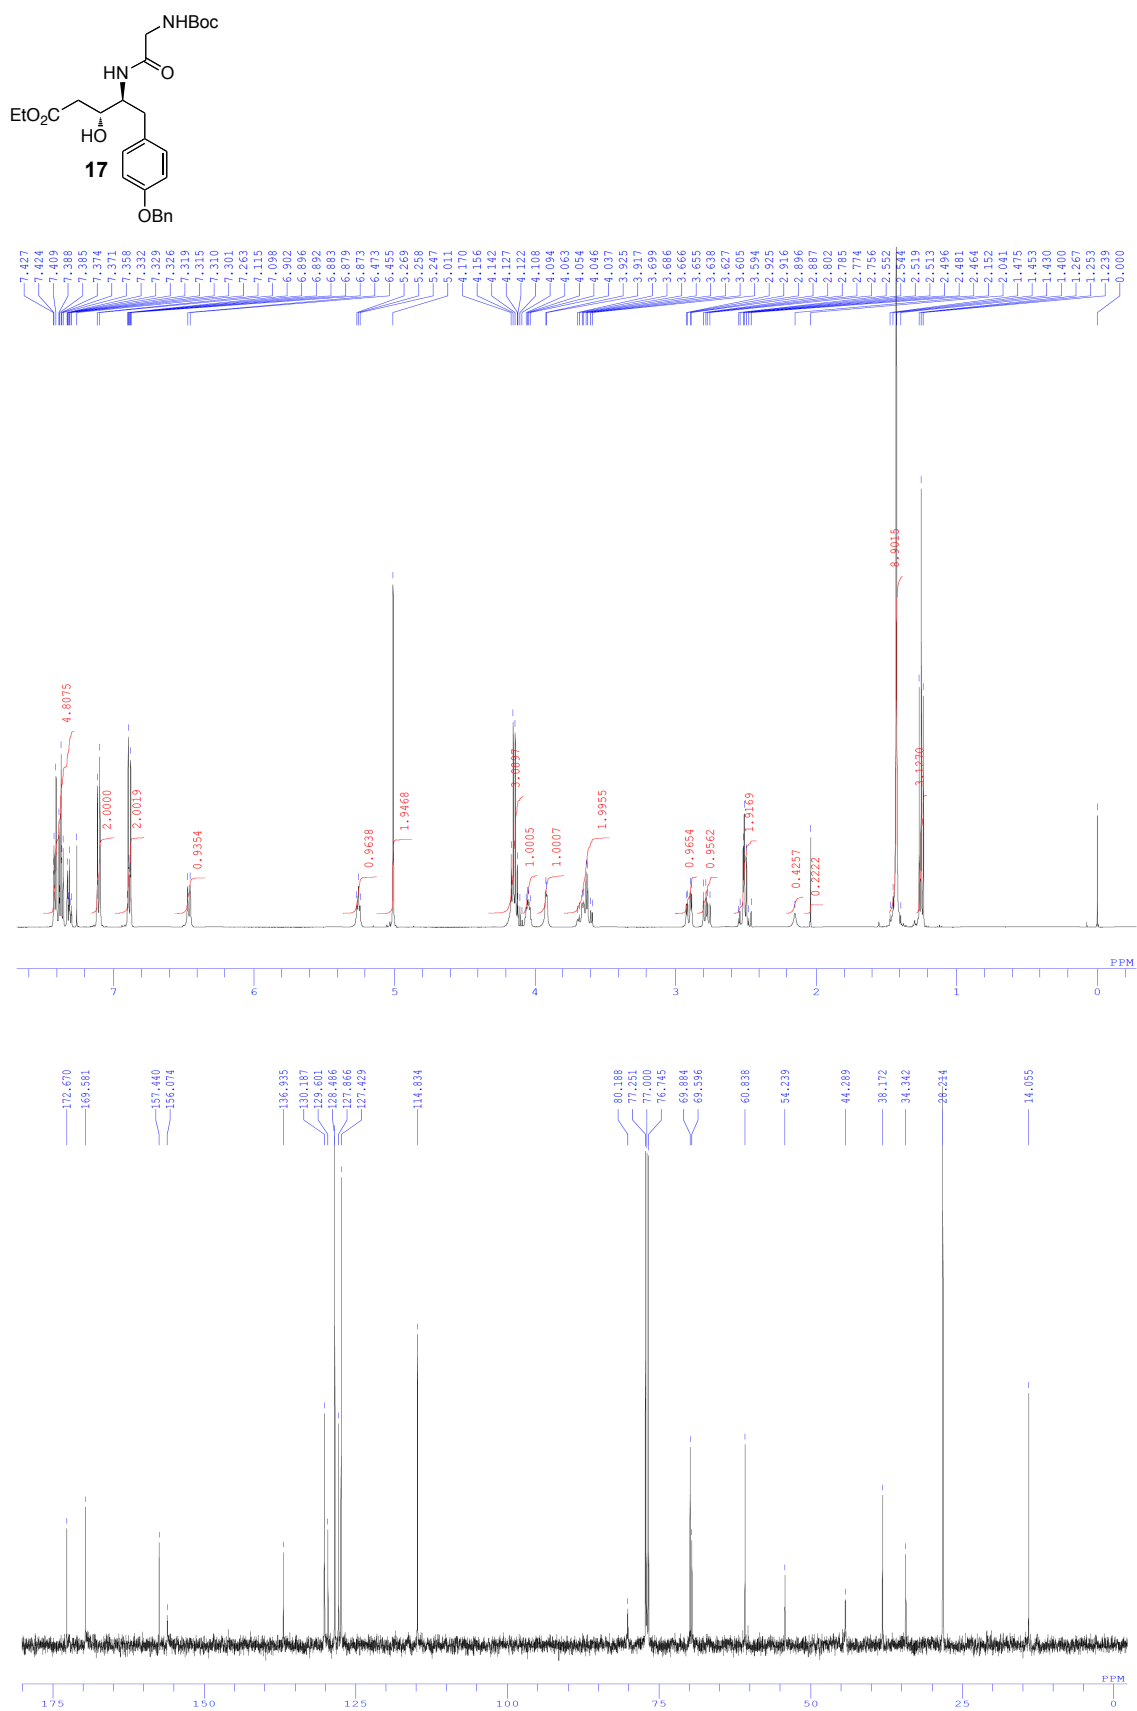

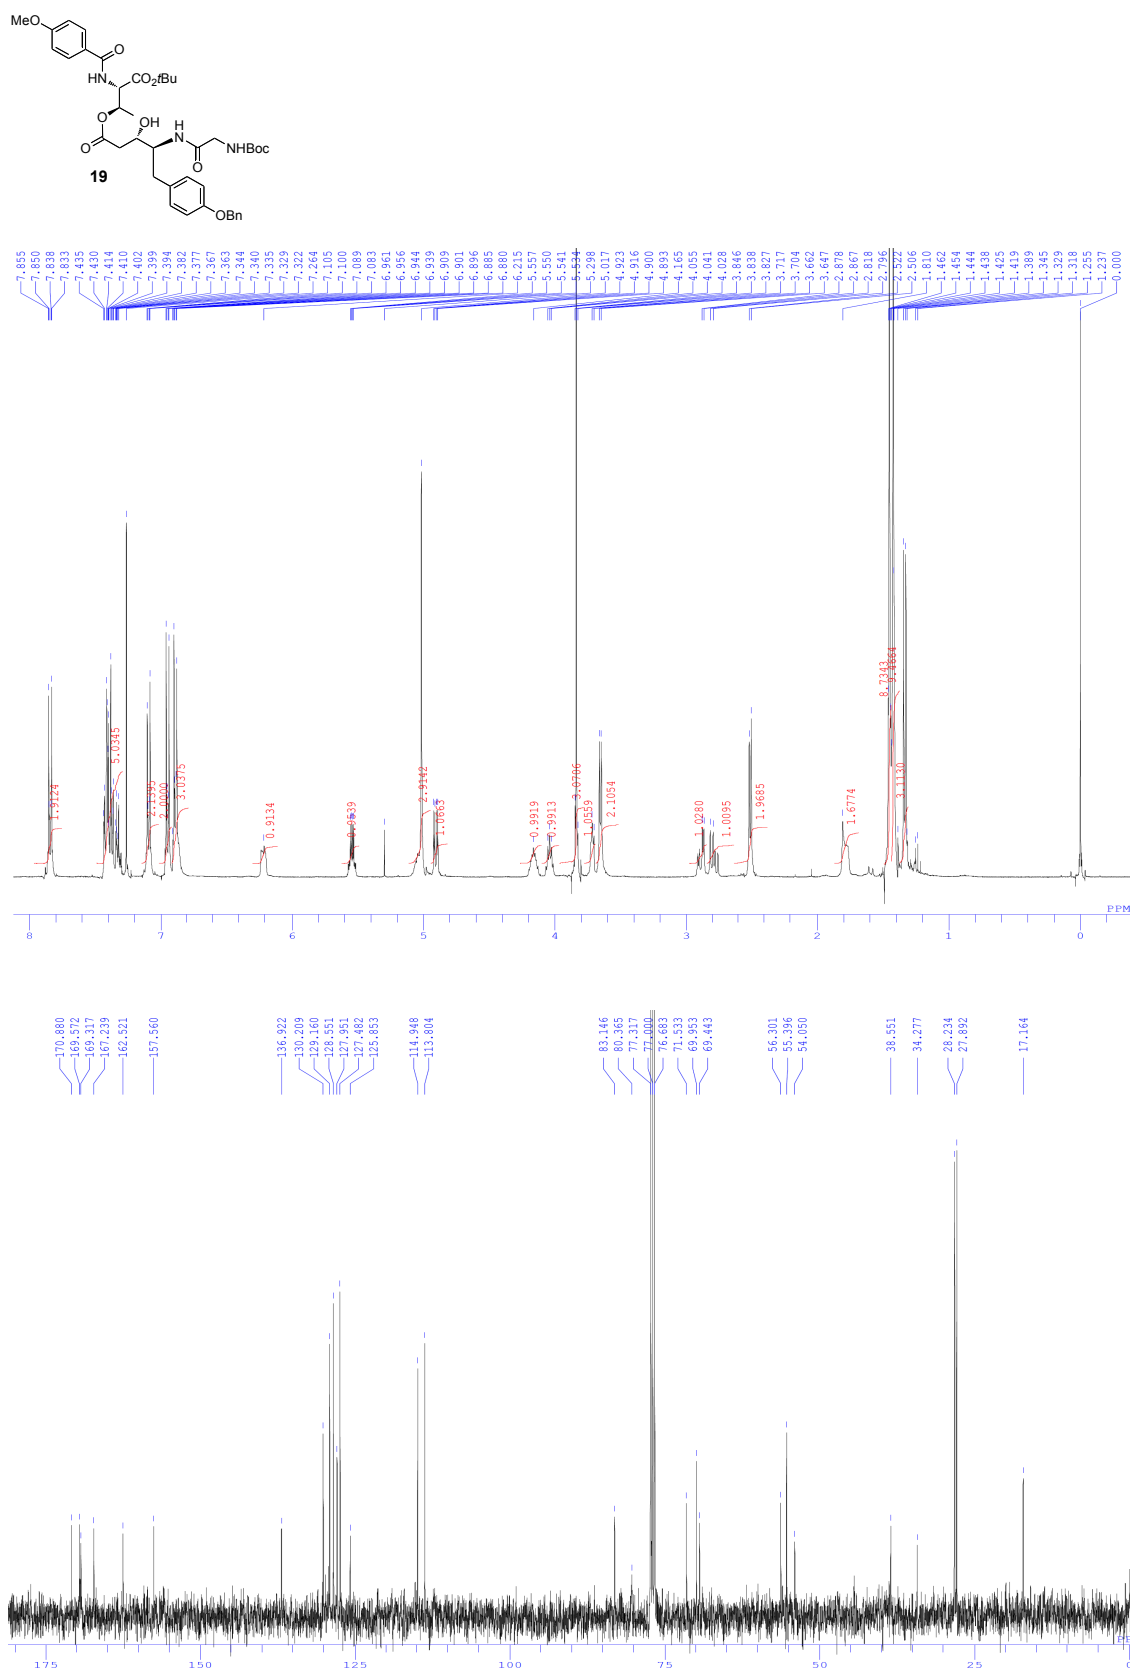

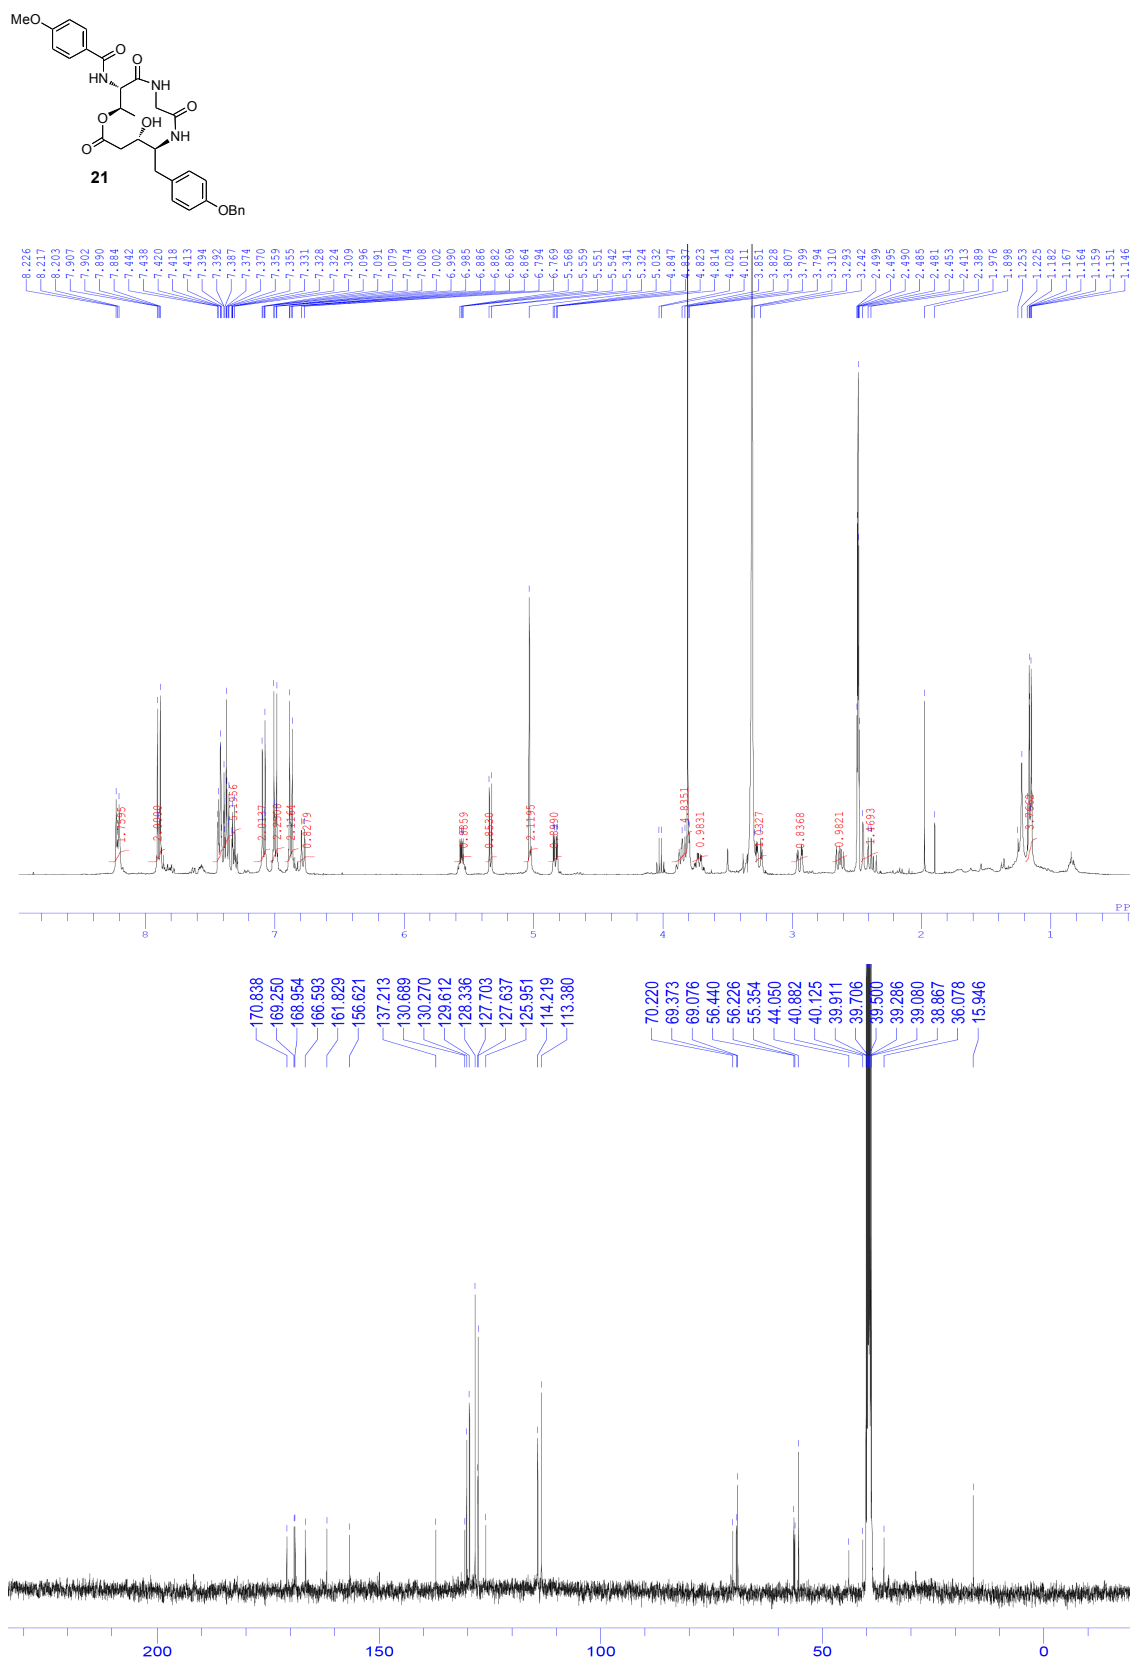

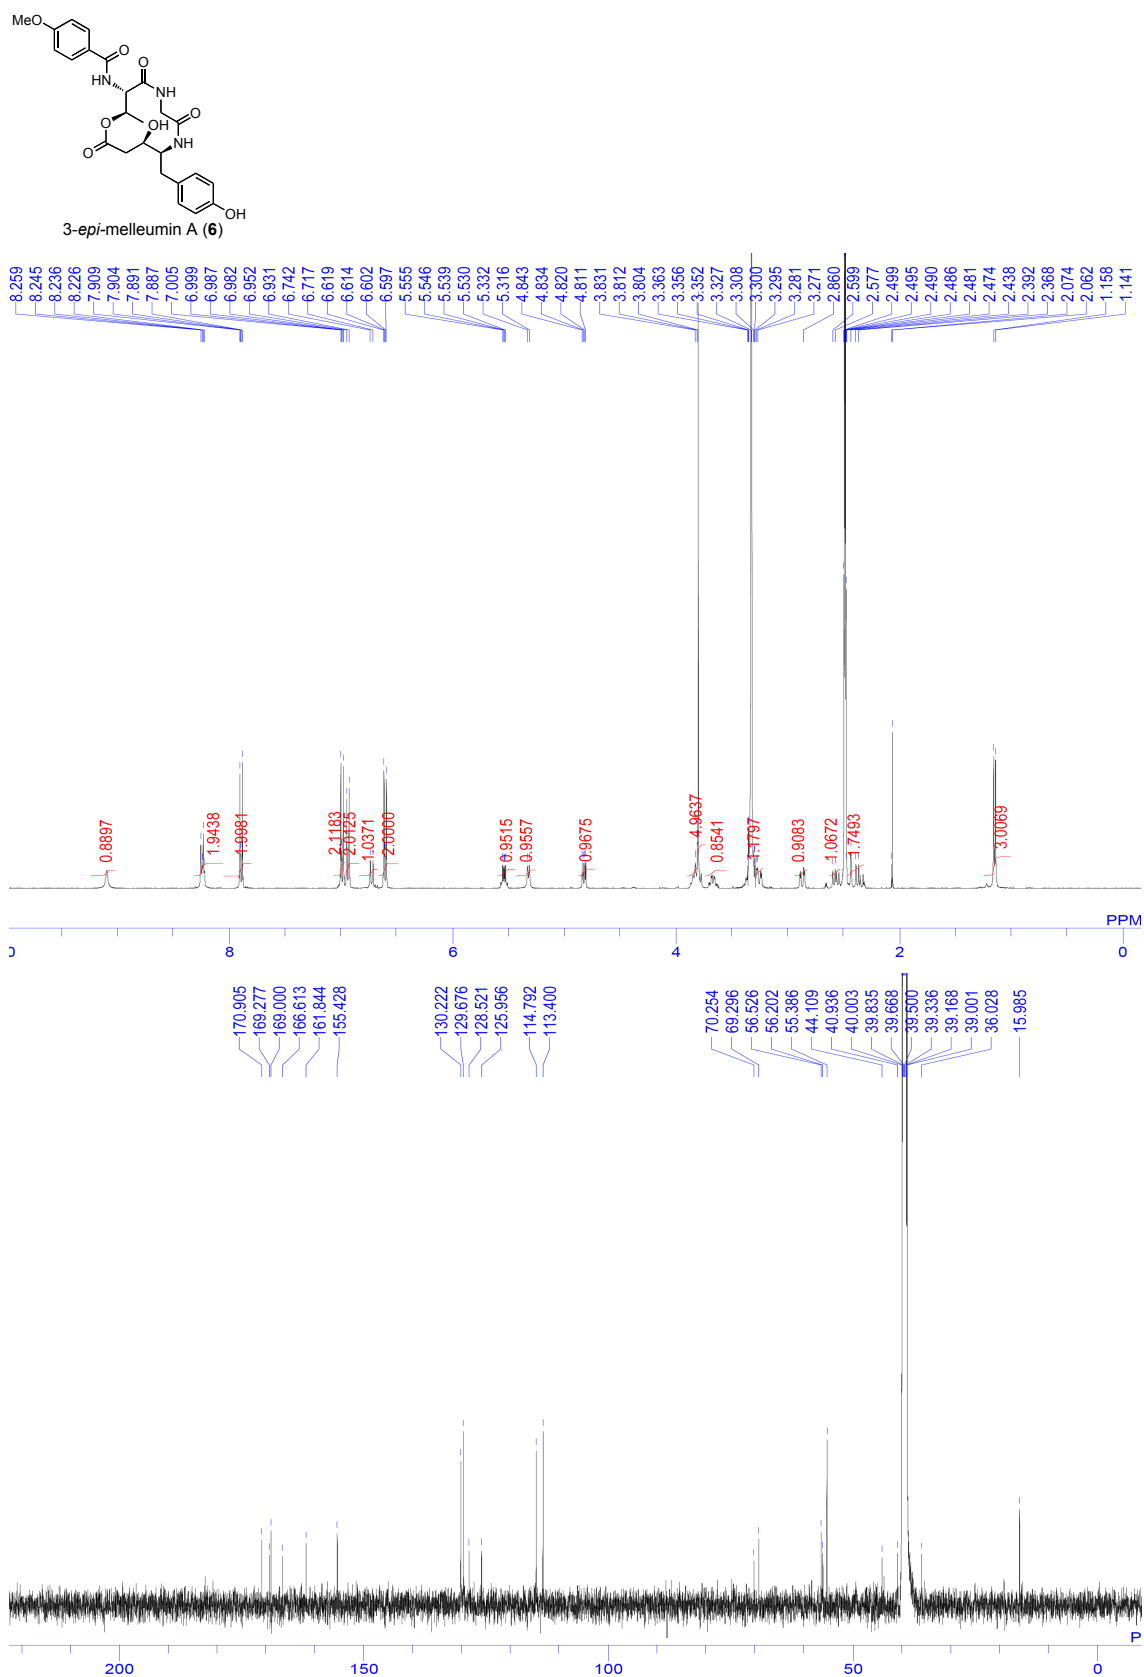

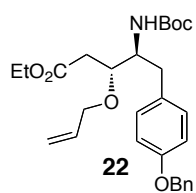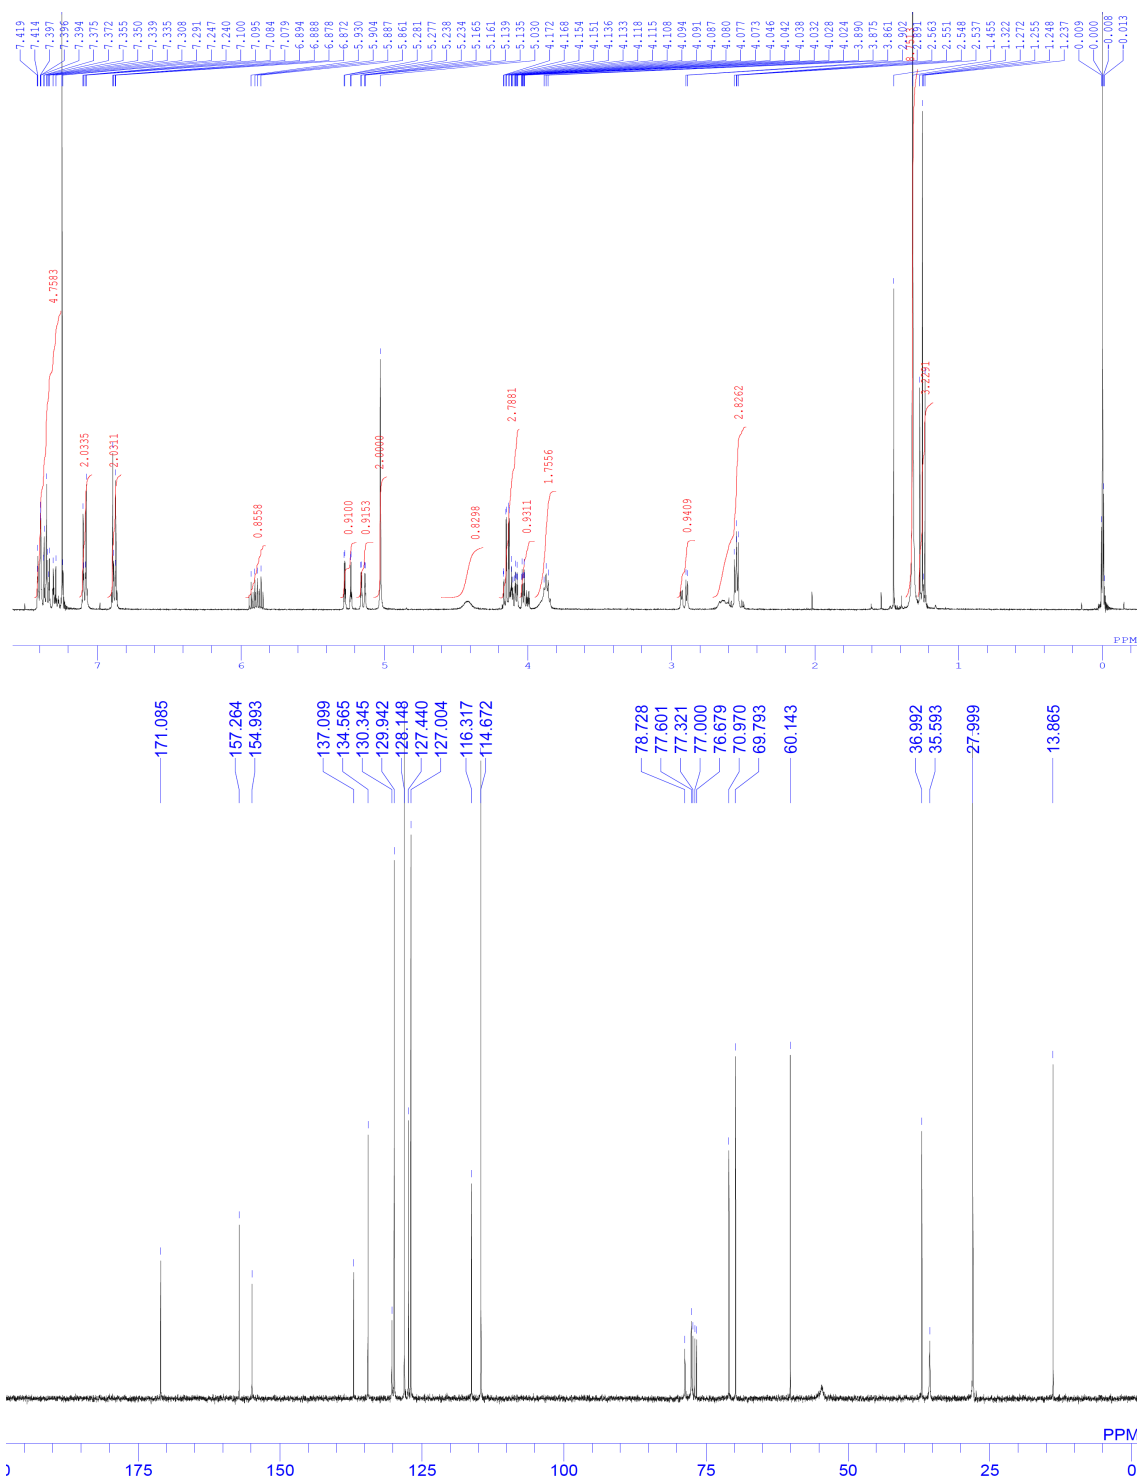

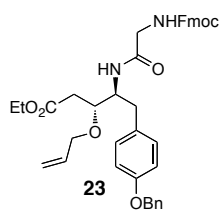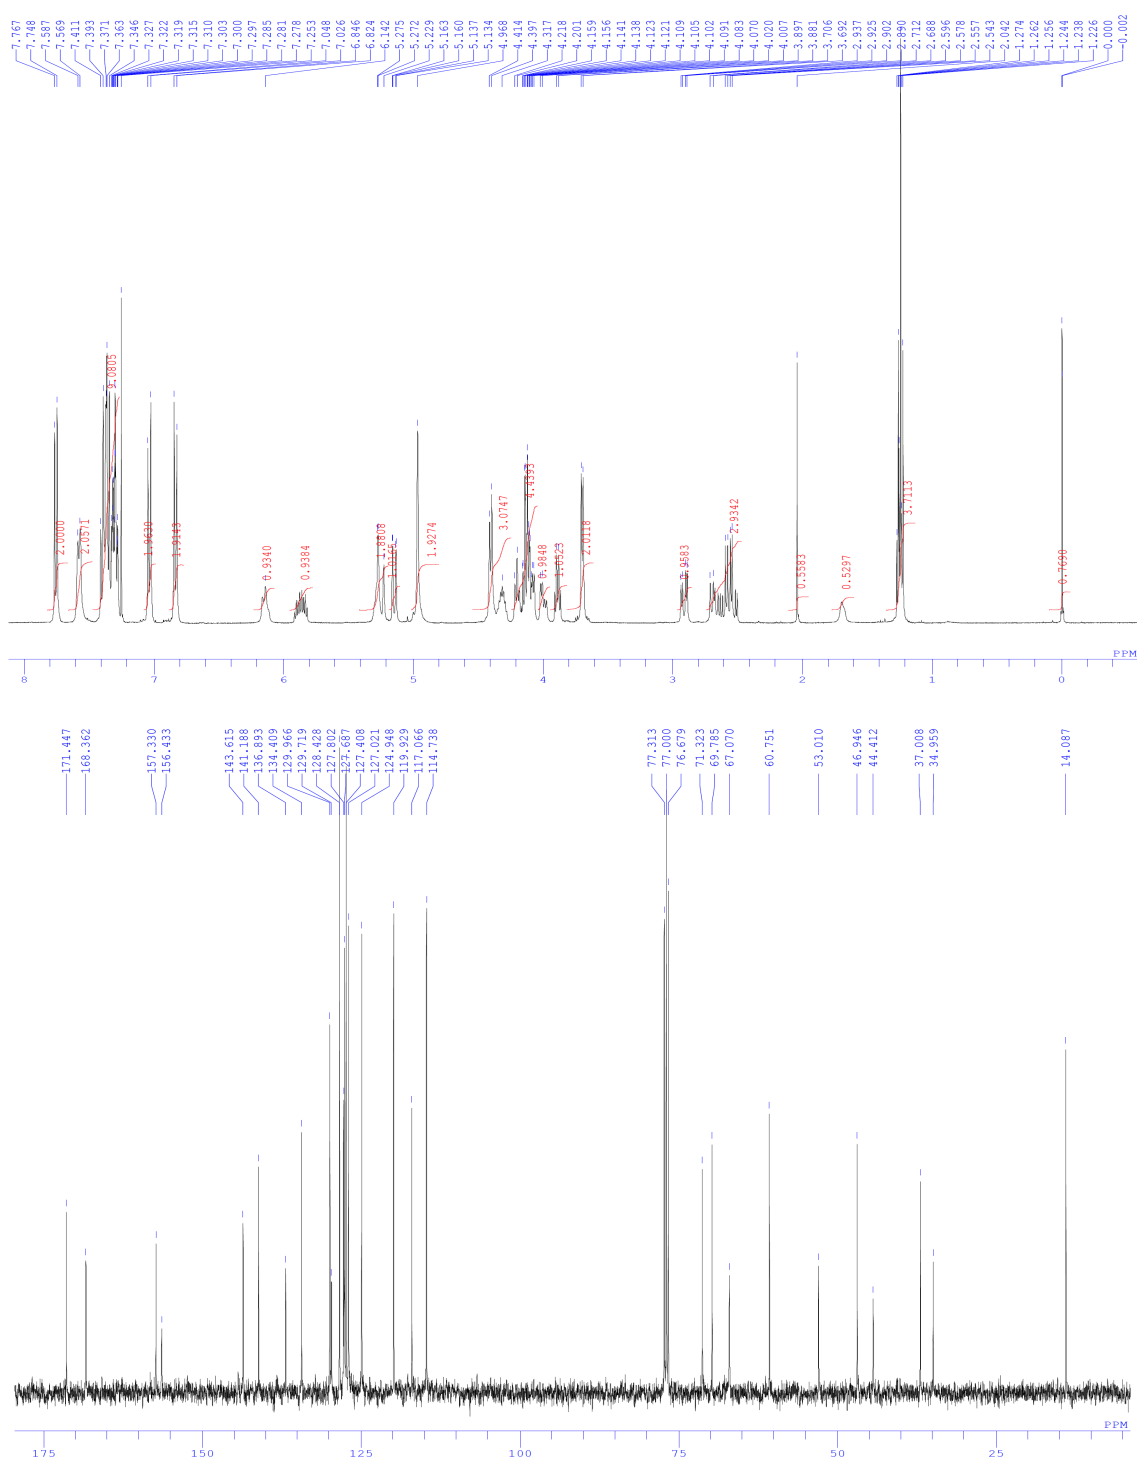

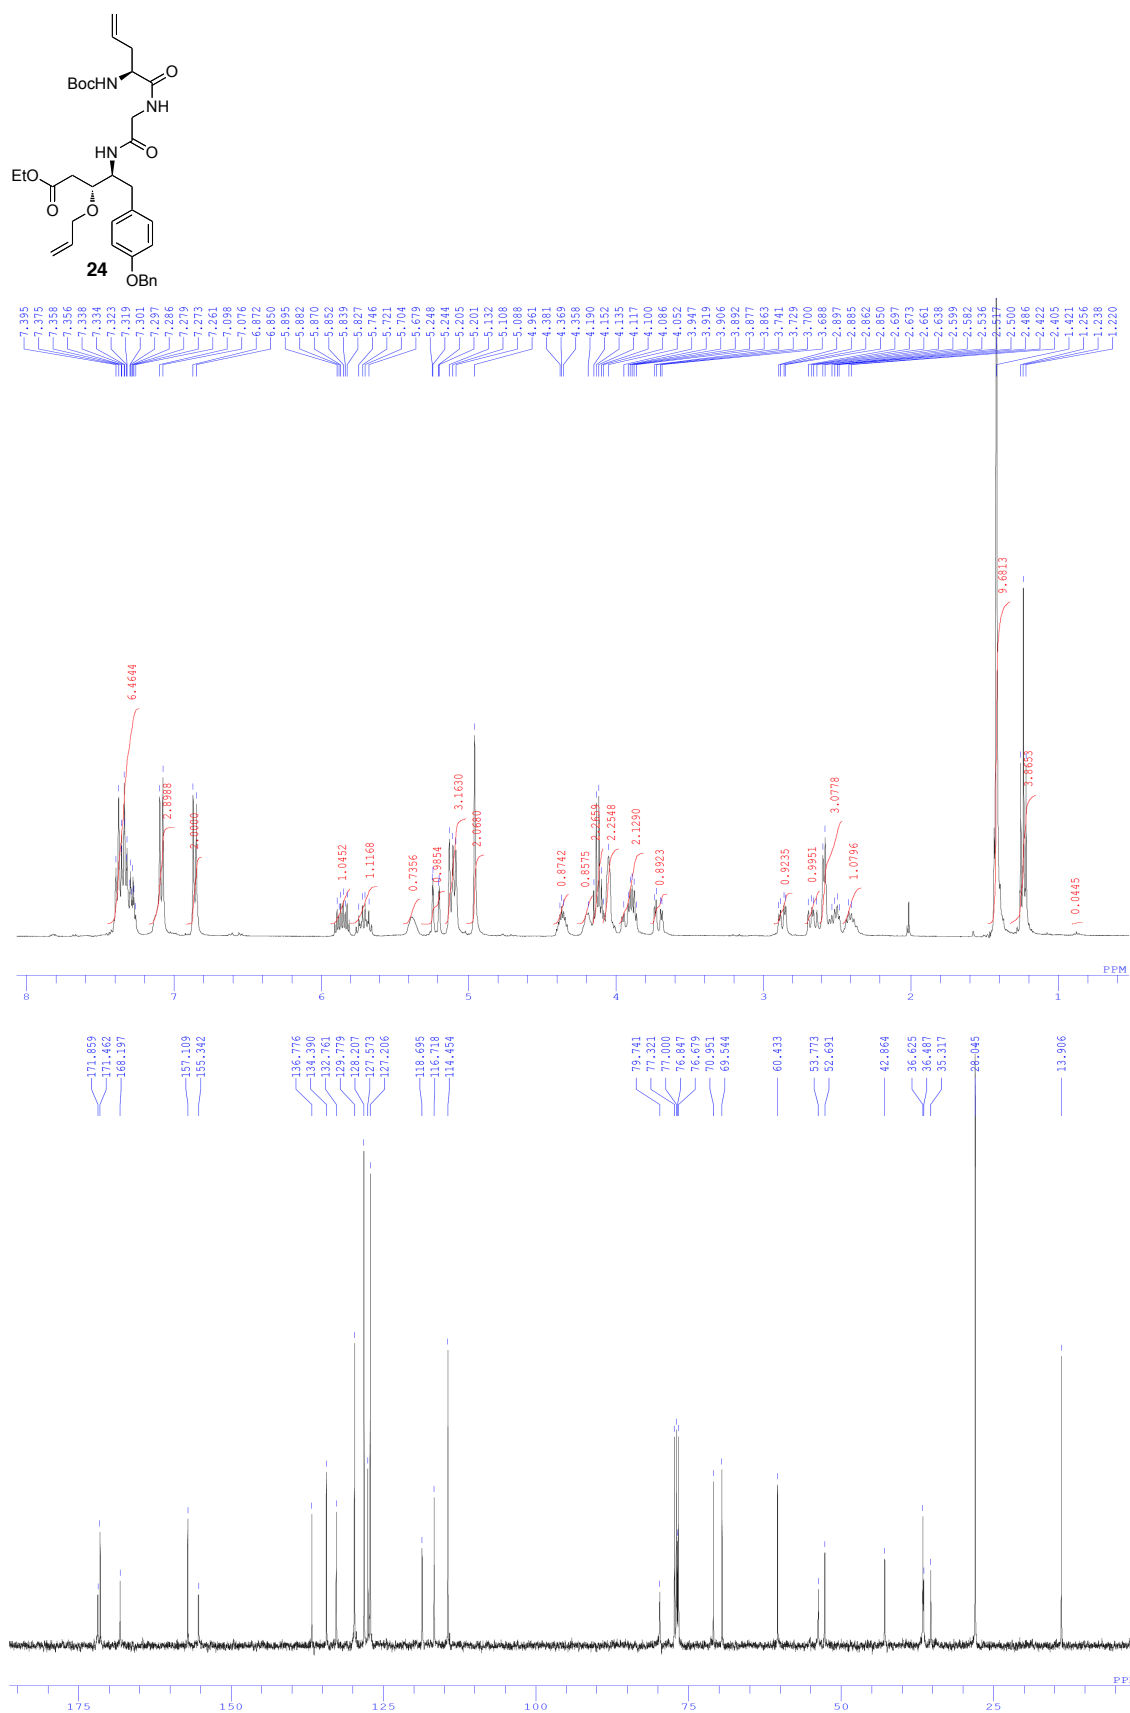



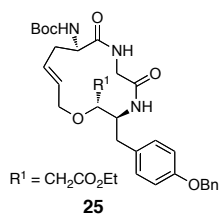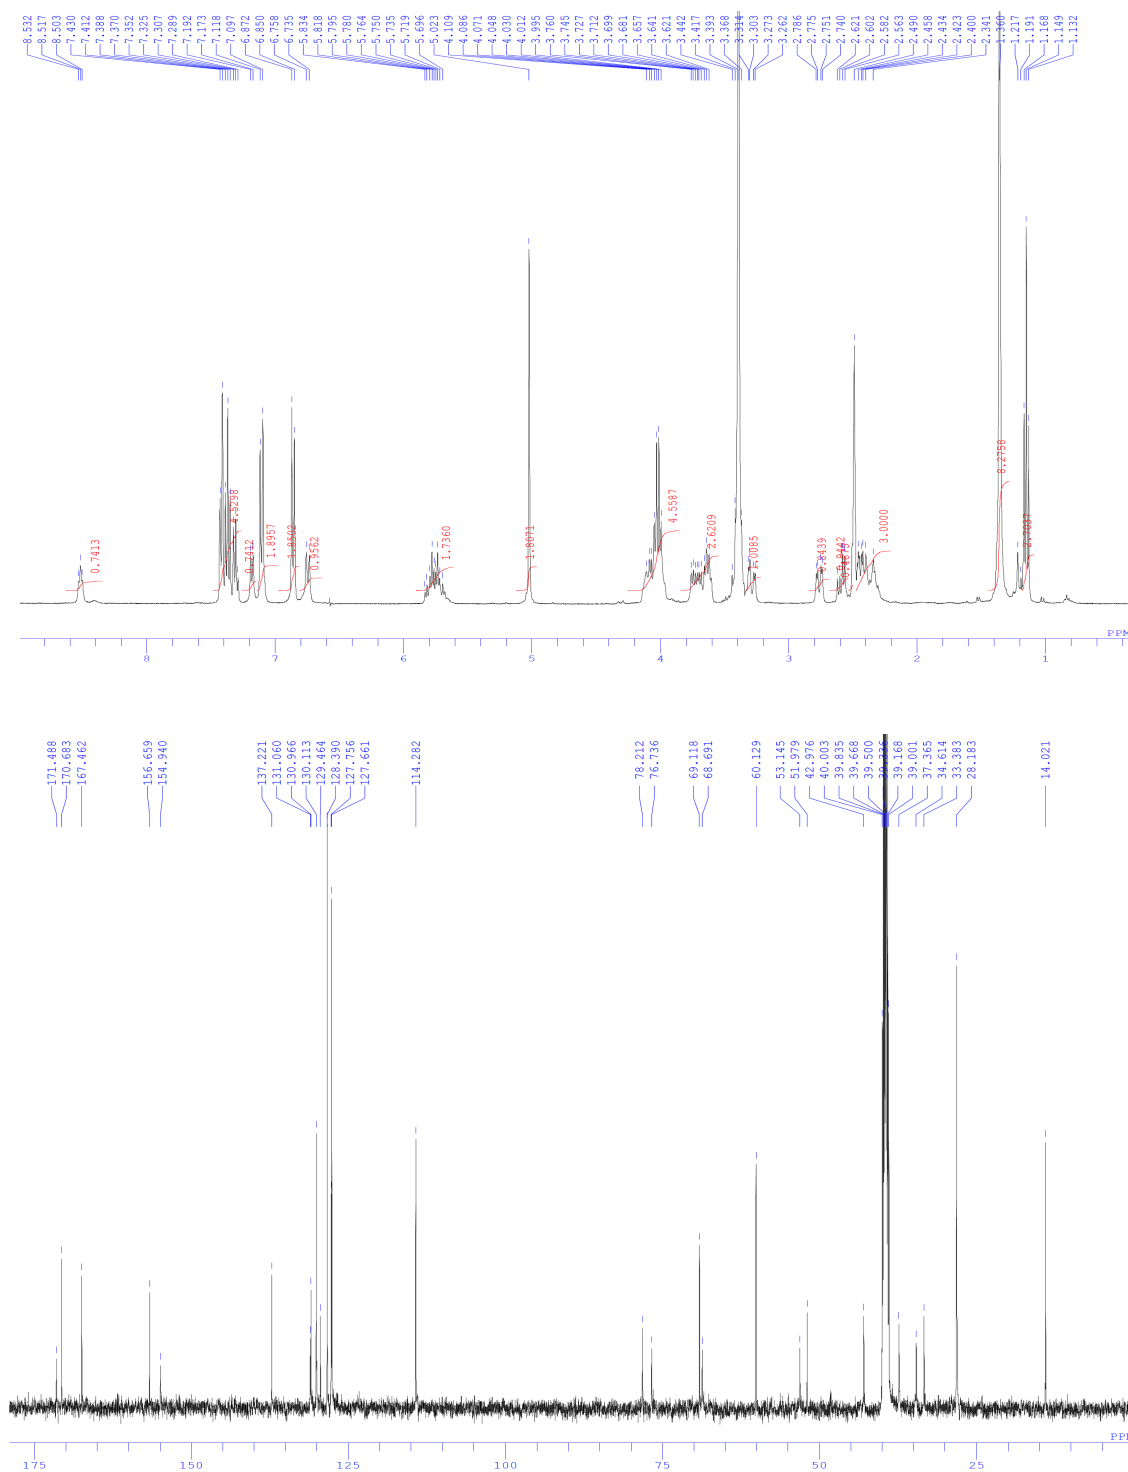

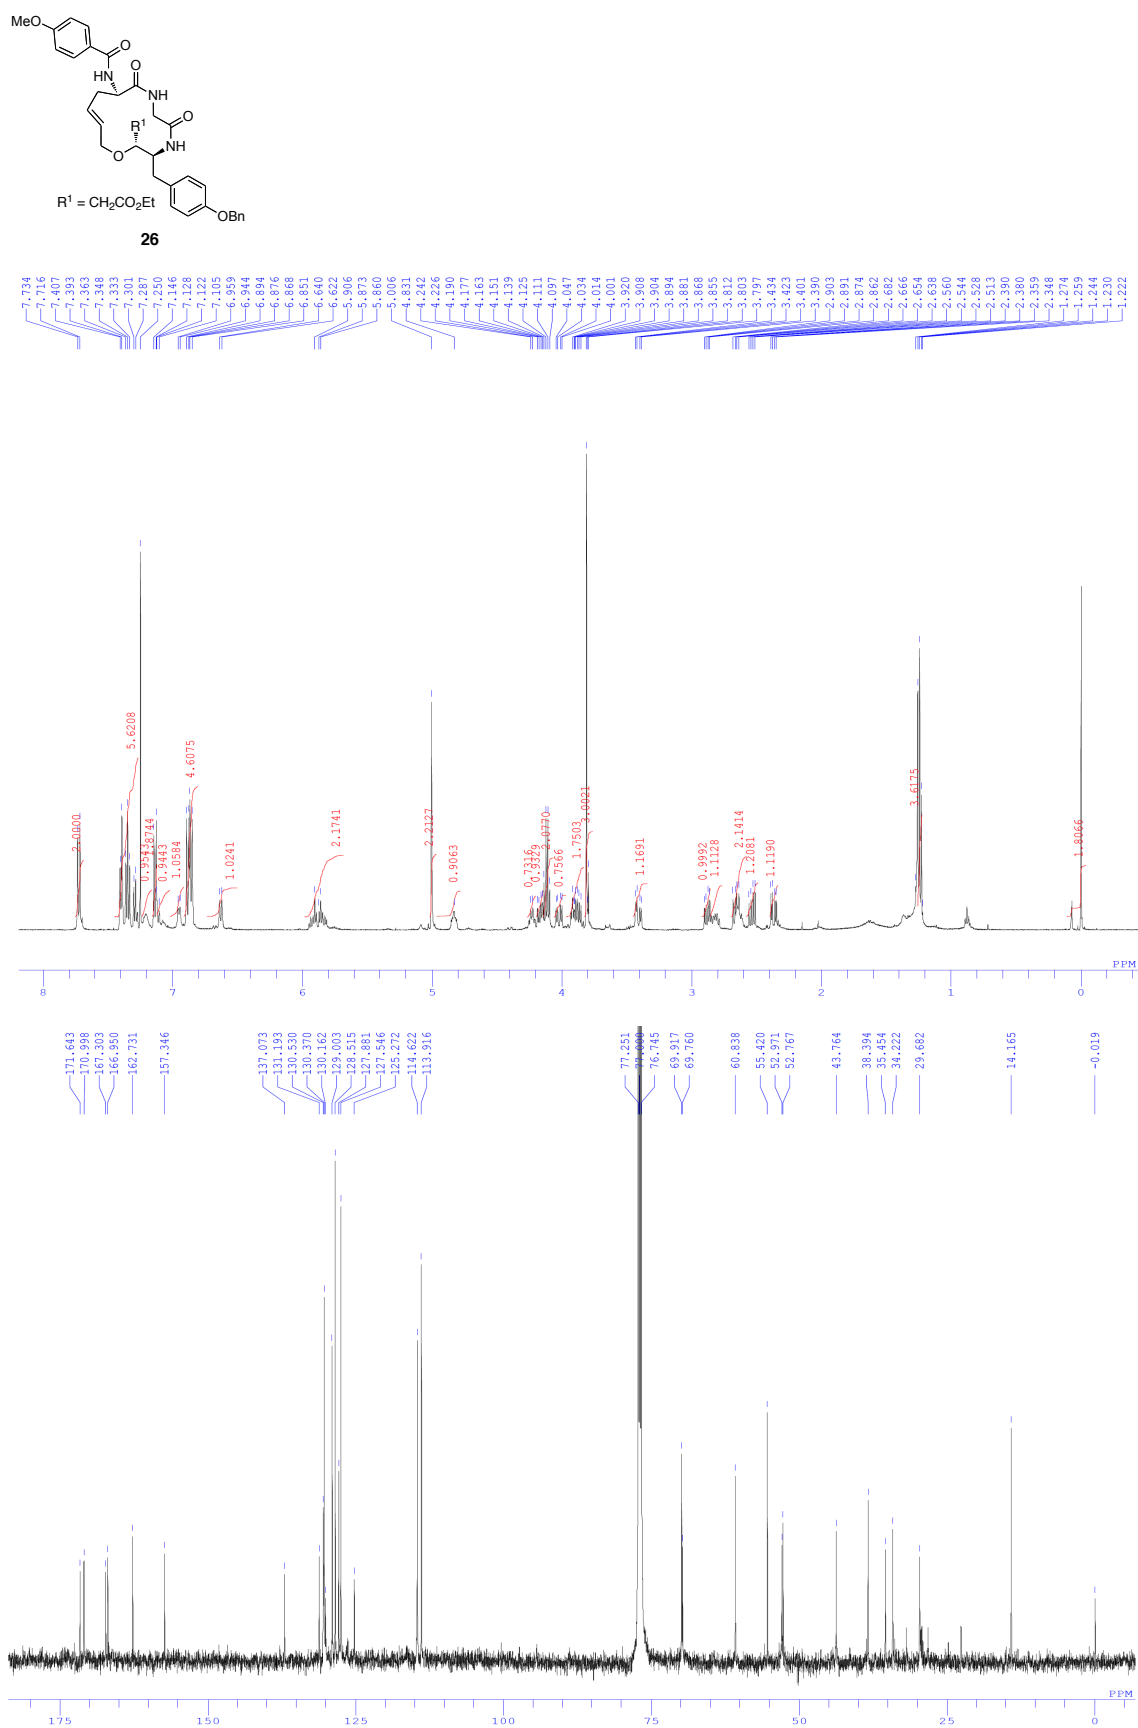

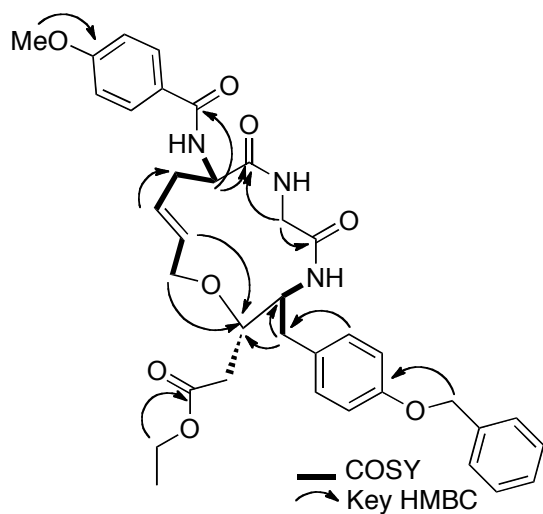

$^1\text{H}$ - $^1\text{H}$  COSY and HMBC correlations of **26**

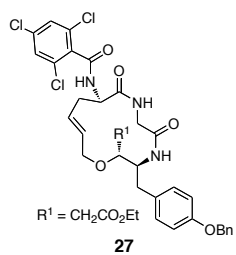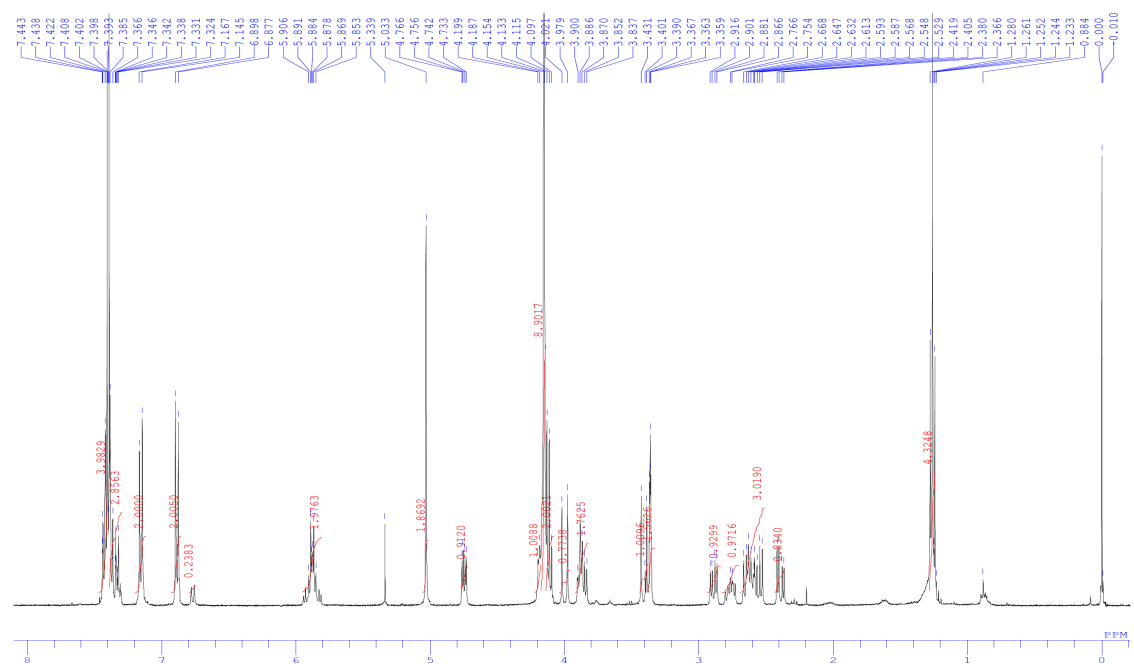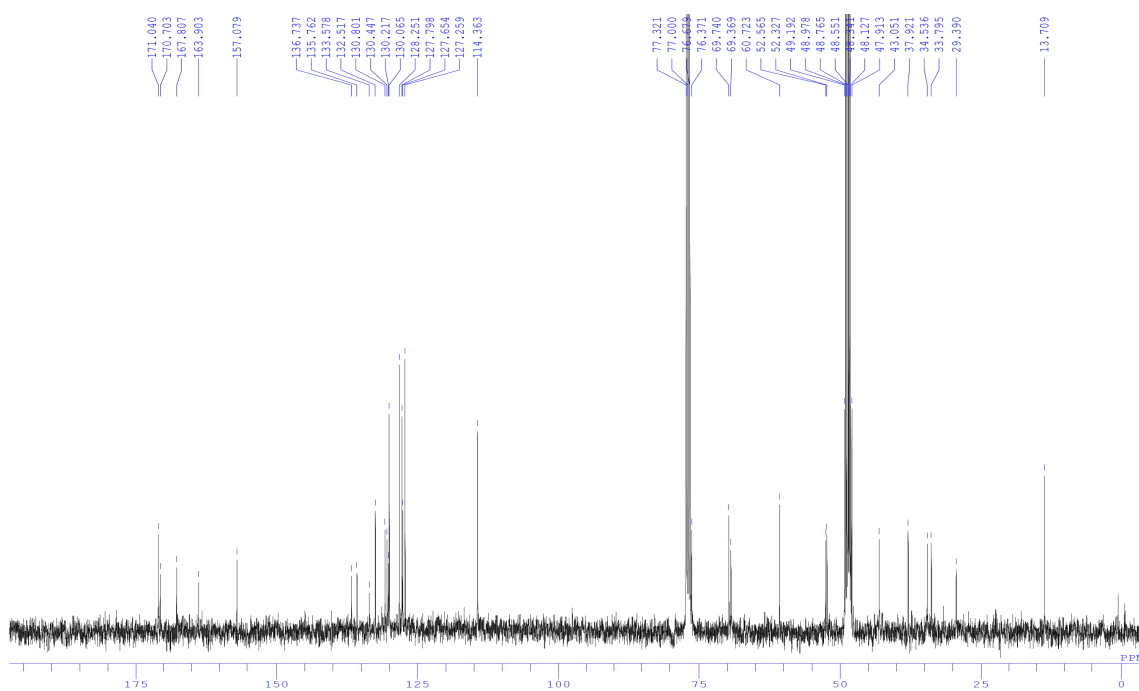

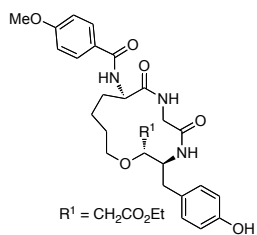

**28**

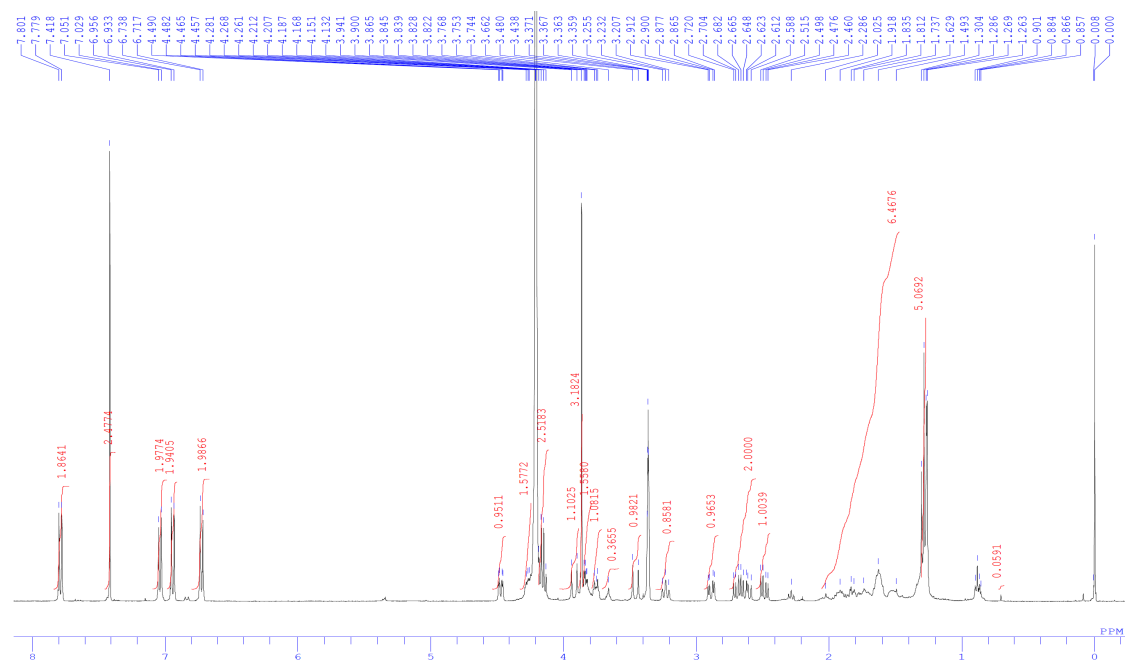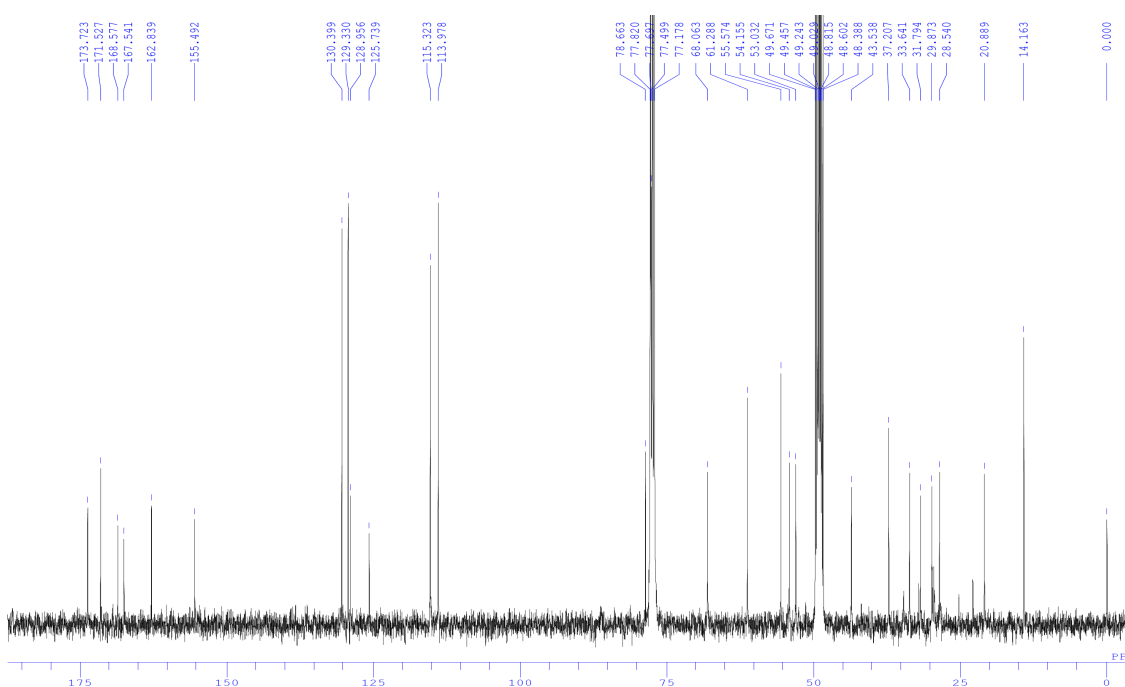

## X-ray Structure Report

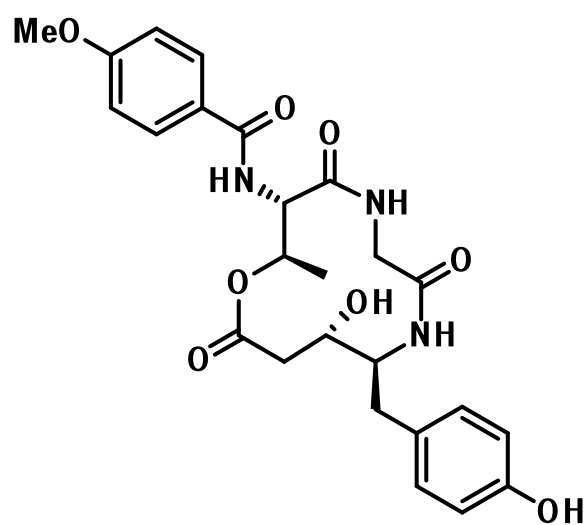

**melleumin A**

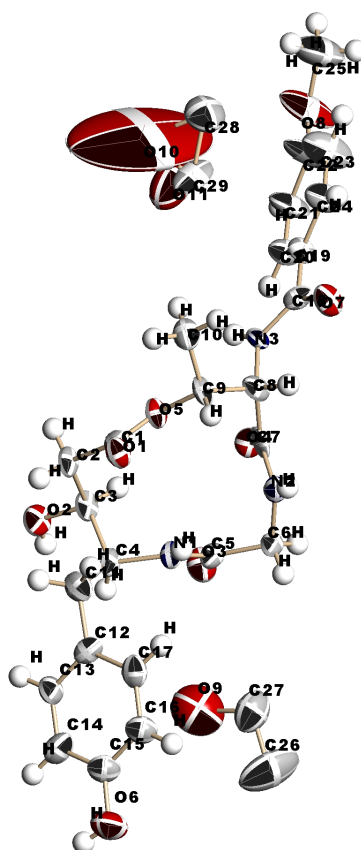

Table 1. Crystal data and structure refinement.

|                                   |                                                               |                |
|-----------------------------------|---------------------------------------------------------------|----------------|
| Empirical formula                 | C <sub>25</sub> H <sub>29</sub> N <sub>3</sub> O <sub>8</sub> |                |
| Formula weight                    | 499.51                                                        |                |
| Temperature                       | 298 K                                                         |                |
| Wavelength                        | 0.71073 Å                                                     |                |
| Crystal system                    | Monoclinic                                                    |                |
| Space group                       | P2(1)                                                         |                |
| Unit cell dimensions              | a = 10.9532(17) Å                                             | α = 90°        |
|                                   | b = 7.9598(13) Å                                              | β = 96.705(2)° |
|                                   | c = 17.259(3) Å                                               | γ = 90°        |
| Volume                            | 1494.4(4) Å <sup>3</sup>                                      |                |
| Z                                 | 2                                                             |                |
| Density (calculated)              | 1.110 Mg/m <sup>3</sup>                                       |                |
| Absorption coefficient            | 0.084 mm <sup>-1</sup>                                        |                |
| F(000)                            | 528                                                           |                |
| Crystal size                      | 0.45 x 0.20 x 0.15 mm <sup>3</sup>                            |                |
| Theta range for data collection   | 1.19 to 19.09°.                                               |                |
| Index ranges                      | -7 ≤ h ≤ 10, -7 ≤ k ≤ 7, -15 ≤ l ≤ 15                         |                |
| Reflections collected             | 3934                                                          |                |
| Independent reflections           | 2341 [R(int) = 0.0250]                                        |                |
| Completeness to theta = 19.09–    | 99.5 %                                                        |                |
| Absorption correction             | Empirical                                                     |                |
| Max. and min. transmission        | 0.9039 and 0.8988                                             |                |
| Refinement method                 | Full-matrix least-squares on F <sup>2</sup>                   |                |
| Data / restraints / parameters    | 2341 / 1 / 396                                                |                |
| Goodness-of-fit on F <sup>2</sup> | 0.929                                                         |                |
| Final R indices [I > 2σ(I)]       | R1 = 0.0693, wR2 = 0.1875                                     |                |
| R indices (all data)              | R1 = 0.0761, wR2 = 0.1984                                     |                |
| Absolute structure parameter      | 0(3)                                                          |                |
| Extinction coefficient            | 0.064(9)                                                      |                |
| Largest diff. peak and hole       | 1.165 and -0.313 e.Å <sup>-3</sup>                            |                |
| Detector                          | Rigaku Saturn                                                 |                |
| Goniometer                        | Rigaku AFC10                                                  |                |
| Radiation                         | MoKα                                                          |                |
